# Supplementary material
Source: PubMed Central journal article supplement (PMC2544570)
Supplement: 0806616105_0806616105SI.pdf [file 0806616105_0806616105SI.pdf]

# Supporting Information

Guerau-de-Arellano *et al.* 10.1073/pnas.0806616105

Table S1. List of Aire-induced genes common to islets and MECs

| Name         | Gene title                                                                       | Gene symbol  | Islet FC | MEC FC |
|--------------|----------------------------------------------------------------------------------|--------------|----------|--------|
| 1435314.at   | Tryptophan hydroxylase 2                                                         | Tph2         | 13.69    | 3.52   |
| 1417976.at   | Adenosine deaminase                                                              | Ada          | 10.75    | 2.03   |
| 1416809.at   | Cytochrome P450, family 3, subfamily a, polypeptide 11                           | Cyp3a11      | 8.3      | 3.41   |
| 1418438.at   | Fatty acid-binding protein 2, intestinal                                         | Fabp2        | 6.96     | 7.58   |
| 1424451.at   | Acetyl-Coenzyme A acyltransferase 1B                                             | Acaa1b       | 6.42     | 2.15   |
| 1431077.at   | Alkaline phosphatase, intestinal                                                 | Alpi         | 5.9      | 2.11   |
| 1438840.x.at | Apolipoprotein A-I                                                               | Apoa1        | 5.2      | 5.13   |
| 1419473.a.at | Cholecystokinin                                                                  | Cck          | 4.82     | 5.52   |
| 1455201.x.at | Apolipoprotein A-I                                                               | Apoa1        | 4.65     | 5.08   |
| 1439768.x.at | Sema domain, immunoglobulin domain (Ig), TM domain, and short cytoplasmic domain | Sema4f       | 4.52     | 2.35   |
| 1418486.at   | Vanin 1                                                                          | Vnn1         | 4.45     | 7.41   |
| 1455593.at   | Apolipoprotein B                                                                 | Apob         | 4.44     | 4.9    |
| 1419232.a.at | Apolipoprotein A-I                                                               | Apoa1        | 4.31     | 5.38   |
| 1447845.s.at | Vanin 1                                                                          | Vnn1         | 4.15     | 7.41   |
| 1438751.at   | Solute carrier family 30, member 10                                              | Slc30a10     | 4.05     | 2.11   |
| 1448764.a.at | Fatty acid-binding protein 1, liver                                              | Fabp1        | 3.87     | 2.6    |
| 1419233.x.at | Apolipoprotein A-I                                                               | Apoa1        | 3.86     | 3.76   |
| 1455796.x.at | Olfactomedin 1                                                                   | Olfm1        | 3.81     | 5.05   |
| 1423422.at   | Ankyrin repeat and SOCS box-containing protein 4                                 | Asb4         | 3.56     | 6.49   |
| 1416783.at   | Tachykinin 1                                                                     | Tac1         | 3.5      | 8.93   |
| 1433919.at   | Ankyrin repeat and SOCS box-containing protein 4                                 | Asb4         | 3.4      | 11.76  |
| 1449070.x.at | Adenomatous polyposis coli down-regulated 1                                      | Apcdd1       | 3.28     | 2.1    |
| 1439816.at   | Predicted gene, EG433270                                                         | EG433270     | 3.24     | 2.06   |
| 1417556.at   | Fatty acid-binding protein 1, liver                                              | Fabp1        | 3.21     | 3      |
| 1426255.at   | Neurofilament, light polypeptide                                                 | Nefl         | 3.17     | 4.02   |
| 1453715.at   | Synaptic vesicle glycoprotein 2c                                                 | Sv2c         | 3.09     | 2.36   |
| 1455978.a.at | Matrilin 2                                                                       | Matn2        | 3.03     | 4.17   |
| 1458345.s.at | Collectin sub-family member 11                                                   | Colec11      | 3.03     | 6.45   |
| 1456379.x.at | Delta/notch-like EGF-related receptor                                            | Dner         | 2.99     | 5.75   |
| 1454822.x.at | Adenomatous polyposis coli down-regulated 1                                      | Apcdd1       | 2.98     | 2.58   |
| 1460214.at   | Purkinje cell protein 4                                                          | Pcp4         | 2.96     | 9.26   |
| 1422530.at   | Similar to peripherin 1                                                          | LOC673890    | 2.95     | 2.36   |
| 1418282.x.at | Serine (or cysteine) peptidase inhibitor, clade A, member 1b                     | Serpina1b    | 2.9      | 3.14   |
| 1436188.a.at | N-myc downstream-regulated gene 4                                                | Ndr4         | 2.9      | 2.98   |
| 1435767.at   | Sodium channel, voltage-gated, type III, beta                                    | Scn3b        | 2.88     | 2.28   |
| 1422520.at   | Neurofilament, medium polypeptide                                                | Nefm         | 2.86     | 2.61   |
| 1454677.at   | Tissue inhibitor of metalloproteinase 2                                          | Timp2        | 2.85     | 2.19   |
| 1417746.at   | Complexin 1                                                                      | Cplx1        | 2.85     | 2.75   |
| 1425784.a.at | Olfactomedin 1                                                                   | Olfm1        | 2.81     | 2.16   |
| 1437052.s.at | Solute carrier family 2 (facilitated glucose transporter), member 3              | Slc2a3       | 2.8      | 3.82   |
| 1416306.at   | Chloride channel calcium-activated 3                                             | Clca3        | 2.79     | 2.6    |
| 1425645.s.at | Cytochrome P450, family 2, subfamily b, polypeptide 10                           | Cyp2b10      | 2.77     | 2.6    |
| 1424041.s.at | Complement component 1, s subcomponent                                           | C1 s         | 2.75     | 2.16   |
| 1457296.at   | Cartilage intermediate-layer protein, nucleotide pyrophosphohydrolase            | Cilp         | 2.75     | 14.93  |
| 1454672.at   | —                                                                                | —            | 2.74     | 2.26   |
| 1451513.x.at | Serine (or cysteine) peptidase inhibitor, clade A, member 1a/1b                  | Serpina1a/1b | 2.67     | 2.34   |
| 1434202.a.at | cDNA sequence BC055107                                                           | BC055107     | 2.66     | 2.82   |
| 1423671.at   | Delta/notch-like EGF-related receptor                                            | Dner         | 2.64     | 2.79   |
| 1451194.at   | Aldolase 2, B isoform                                                            | Aldob        | 2.63     | 2.62   |
| 1448323.a.at | Biglycan                                                                         | Bgn          | 2.61     | 5.32   |
| 1426712.at   | Solute carrier family 6 (neurotransmitter transporter), member 15                | Slc6a15      | 2.58     | 11.49  |
| 1448745.s.at | Loricrin                                                                         | Lor          | 2.53     | 3.77   |
| 1433434.at   | Expressed sequence AW551984                                                      | AW551984     | 2.46     | 3.44   |
| 1423110.at   | Procollagen, type I, alpha 2                                                     | Col1a2       | 2.45     | 2.03   |
| 1449240.at   | G substrate                                                                      | Gsbs         | 2.43     | 7.35   |

Table S1. *Continued*

| Name         | Gene title                                                                         | Gene symbol   | Islet FC | MEC FC |
|--------------|------------------------------------------------------------------------------------|---------------|----------|--------|
| 1455893_at   | R-spondin 2 homolog ( <i>Xenopus laevis</i> )                                      | Rspo2         | 2.38     | 4.42   |
| 1433787_at   | NEL-like 1 (chicken)                                                               | Nell1         | 2.38     | 4.74   |
| 1417061_at   | Solute carrier family 40 (iron-regulated transporter), member 1                    | Slc40a1       | 2.38     | 2.71   |
| 1425763_x_at | Immunoglobulin heavy chain (J558 family)                                           | Igh-VJ558     | 2.37     | 4.42   |
| 1451236_at   | RAS-like, estrogen-regulated, growth-inhibitor                                     | Rerg          | 2.37     | 2.01   |
| 1449106_at   | Glutathione peroxidase 3                                                           | Gpx3          | 2.37     | 2.71   |
| 1448123_s_at | Transforming growth factor, beta-induced                                           | Tgfb1         | 2.36     | 2.7    |
| 1435551_at   | Formin homology 2 domain-containing 3                                              | Fhod3         | 2.35     | 2.06   |
| 1426766_at   | RIKEN cDNA 6330403K07 gene                                                         | 6330403K07Rik | 2.34     | 5.38   |
| 1415923_at   | Necdin                                                                             | Ndn           | 2.33     | 2.33   |
| 1416405_at   | Biglycan                                                                           | Bgn           | 2.33     | 6.25   |
| 1435382_at   | Necdin                                                                             | Ndn           | 2.31     | 2.39   |
| 1448832_a_at | Complexin 1                                                                        | Cplx1         | 2.3      | 2.19   |
| 1426615_s_at | N-myc downstream- regulated gene 4                                                 | Ndrng4        | 2.27     | 2.73   |
| 1421653_a_at | Immunoglobulin heavy chain (J558 family)                                           | Igh-VJ558     | 2.26     | 5.1    |
| 1451446_at   | Anthrax toxin receptor 1                                                           | Antxr1        | 2.26     | 2.13   |
| 1456250_x_at | Transforming growth factor, beta-induced                                           | Tgfb1         | 2.26     | 2.56   |
| 1449254_at   | Secreted phosphoprotein 1                                                          | Spp1          | 2.25     | 3.61   |
| 1455907_x_at | Paired-like homeobox 2b                                                            | Phox2b        | 2.25     | 3.46   |
| 1415885_at   | Chromogranin B                                                                     | Chgb          | 2.25     | 4.2    |
| 1435383_x_at | Necdin                                                                             | Ndn           | 2.23     | 2.4    |
| 1417133_at   | Peripheral myelin protein                                                          | Pmp22         | 2.22     | 2.02   |
| 1455792_x_at | Necdin                                                                             | Ndn           | 2.22     | 2.14   |
| 1451440_at   | Chondrolectin                                                                      | Chodl         | 2.21     | 2.58   |
| 1437463_x_at | Transforming growth factor, beta-induced                                           | Tgfb1         | 2.17     | 2.5    |
| 1416625_at   | Serine (or cysteine) peptidase inhibitor, clade G, member 1                        | Serping1      | 2.16     | 2.15   |
| 1452035_at   | Procollagen, type IV, alpha 1                                                      | Col4a1        | 2.13     | 2.04   |
| 1421882_a_at | ELAV (embryonic lethal, abnormal vision, <i>Drosophila</i> )-like 2 (Hu antigen B) | Elavl2        | 2.12     | 2.43   |
| 1416200_at   | interleukin 33                                                                     | Il33          | 2.12     | 5.85   |
| 1425102_a_at | Angiotensin I-converting enzyme (peptidyl-dipeptidase A) 2                         | Ace2          | 2.11     | 2.07   |
| 1455898_x_at | Solute carrier family 2 (facilitated glucose transporter), member 3                | Slc2a3        | 2.11     | 3.5    |
| 1429896_at   | RIKEN cDNA 5830408B19 gene                                                         | 5830408B19Rik | 2.1      | 2.24   |
| 1428664_at   | Vasoactive intestinal polypeptide                                                  | Vip           | 2.08     | 8.93   |
| 1457352_x_at | RIKEN cDNA 9430071P14 gene                                                         | 9430071P14Rik | 2.05     | 2.19   |
| 1437671_x_at | Protease, serine, 23                                                               | Prss23        | 2.04     | 2.18   |
| 1437889_x_at | Biglycan                                                                           | Bgn           | 2.03     | 3.92   |
| 1438531_at   | RIKEN cDNA A730054J21 gene                                                         | A730054J21Rik | 2.02     | 2.04   |
| 1416454_s_at | Actin, alpha 2, smooth muscle, aorta                                               | Acta2         | 2.02     | 2.15   |
| 1452114_s_at | Insulin-like growth factor binding protein 5                                       | Igfbp5        | 2        | 2.6    |

**Table S2. List of Aire-repressed genes common to islets and MECs**

| Probe set    | Gene title                               | Gene symbol   | Islet FC | MEC FC |
|--------------|------------------------------------------|---------------|----------|--------|
| 1440781_at   | RIKEN cDNA B830007D08 gene               | B830007D08Rik | 0.34     | 0.46   |
| 1458591_at   | RAS and EF hand domain-containing        | Rasef         | 0.34     | 0.40   |
| 1450344.a_at | Prostaglandin E receptor 3 (subtype EP3) | Ptger3        | 0.37     | 0.50   |
| 1439638_at   | ErbB2-interacting protein                | ErbB2ip       | 0.47     | 0.45   |
| 1437935_at   | RIKEN cDNA 4930486G11 gene               | 4930486G11Rik | 0.48     | 0.36   |
| 1441623_at   | Transcribed locus                        | —             | 0.49     | 0.50   |
